# Supplementary material for: In vivo transplantation of mammalian vascular organoids onto the chick chorioallantoic membrane reveals the formation of a hierarchical vascular network
Source: Springer Nature journal article supplement (doi:10.1038/s41598-025-91826-y), 2025-02-28
Supplement: MOESM1 [file 41598_2025_91826_MOESM1_ESM.pdf]

## **Supplementary Information**

# **In vivo transplantation of mammalian vascular organoids onto the chick chorioallantoic membrane reveals the formation of a hierarchical vascular network**

**William J. Kowalski<sup>1</sup>, Shravani Vatti<sup>1, 4</sup>, Tyler Sakamoto<sup>1, 5</sup>, Wenling Li<sup>1</sup>, Sarah Rose Odutola<sup>1, 5</sup>, Chengyu Liu<sup>2</sup>, Guibin Chen<sup>3</sup>, Manfred Boehm<sup>3</sup>, Yoh-suke Mukoyama<sup>1\*</sup>**

<sup>1</sup>Laboratory of Stem Cell and Neuro-Vascular Biology, Cell and Development Biology Center,

<sup>2</sup>Transgenic Core Facility,

<sup>3</sup>Laboratory of Cardiovascular Regenerative Medicine, Translational Vascular Medicine Branch,

National Heart, Lung, and Blood Institute,

National Institutes of Health, 10 Center Drive, Bethesda, MD, USA

<sup>4</sup>Weill Cornell Graduate School of Medical Sciences, New York, NY, USA

<sup>5</sup>Harvard College, Cambridge, MA, USA

\*Author for correspondence:

E-mail: [mukoyamay@mail.nih.gov](mailto:mukoyamay@mail.nih.gov)

Tel: (301) 451-1663



vessels enveloped with  $\alpha$ SMA<sup>+</sup> cells are present in both models. E-H) Single-channel endothelial staining further shows hierarchical changes between the organoid (E and G) and limb skin (F and H). I-L)  $\alpha$ SMA<sup>+</sup> mural cells were absent or minimal in the immature vasculature (I and J), but were recruited in later stages (K and L). M) The illustration depicts the transition from a vessel plexus formed by vasculogenesis to a mature branched geometry formed through angiogenic remodeling. Created with Biorender.com.

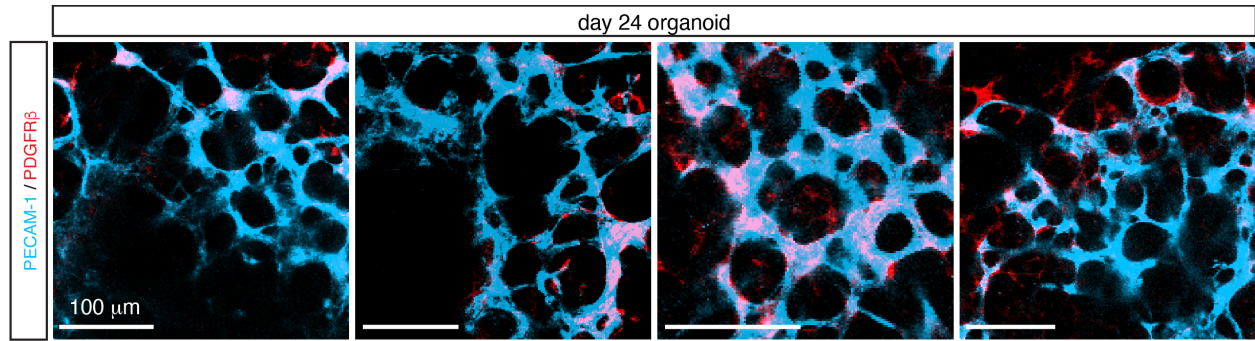

**Figure S2.** Mural cell progenitors associated with endothelial networks expressed PDGFR $\beta$  in addition to NG2 (see Figure 2).

**Table S1. Primary and secondary antibodies for immunostaining**

| <b>antibody</b>   | <b>host</b>                 | <b>vendor/product</b>                | <b>dilution</b> |
|-------------------|-----------------------------|--------------------------------------|-----------------|
| $\alpha$ SMA-FITC | Mouse, clone 1A4            | Sigma, F3777                         | 1:500           |
| NG2               | Guinea Pig                  | Wm. Stallcup, Sanford Burnham Prebys | 1:300           |
| NG2               | Rabbit                      | Millipore, AB5320                    | 1:300           |
| PECAM-1           | Armenian Hamster, clone 2H8 | Millipore, MAB1398Z                  | 1:300           |
| PDGFR $\beta$     | Rabbit                      | Wm. Stallcup, Sanford Burnham Prebys | 1:300           |
| SM22 $\alpha$     | Rabbit                      | Abcam, ab14106                       | 1:500           |

  

| <b>secondary antibody</b>  | <b>fluorophore</b> | <b>vendor/product</b>       | <b>dilution</b> |
|----------------------------|--------------------|-----------------------------|-----------------|
| Goat anti-Armenian Hamster | Cy3                | Jackson Immuno, 127-165-160 | 1:250           |
| Goat anti-Guinea Pig       | AF488              | Jackson Immuno, 106-546-003 | 1:250           |
| Goat anti-Rabbit           | AF647              | Jackson Immuno, 111-605-144 | 1:250           |
|                            |                    | Invitrogen, A21244          | 1:250           |

**Table S2. Gene-specific oligonucleotide primers for qRT-PCR <sup>1,2</sup>**

| gene          | sense (5' to 3')        | antisense (3' to 5')    |
|---------------|-------------------------|-------------------------|
| <i>Nanog</i>  | TCTTCCTGGTCCCCACAGTTT   | GCAAGAATAGTTCTCGGGATGAA |
| <i>Oct3/4</i> | CACCATCTGTCGCTTCGAGG    | AGGGTCTCCGATTGTCATATCT  |
| <i>Pecam1</i> | AACAGAAACCCGTGGAGATG    | GTCTCTGTGGCTCTCGTTCC    |
| <i>Cdh5</i>   | TCAACGCATCTGTGCCAGAGAT  | CACGATTTGGTACAAGACAGTG  |
| <i>Kdr</i>    | TTTGGCAAATACAACCCTTCAGA | GCAGAAGATACTGTCACCACC   |
| <i>Efnb2</i>  | AGGAATCACGGTCCAACAAG    | GTCTCCTGCGGTACTTGAGC    |
| <i>Dll4</i>   | TTCCAGGCAACCTTCTCCGA    | ACTGCCGCTATTCTTGTC      |
| <i>Hey1</i>   | GCGCGGACGAGAATGGAAA     | TCAGGTGATCCACAGTCATCTG  |
| <i>EphB4</i>  | GGTCAGCGCTCTGGACAAGATG  | AGCCGAATCCAGCCGCTGCAA   |
| <i>Nr2f2</i>  | TGGAGAAGCTCAAGGCACTG    | ACGAAGCAAGAGCTTTCCGA    |
| <i>Aplnr</i>  | TGGTGTTCCGTTCCACAGAC    | GGTCACTACAAGCACCACGA    |
| <i>Pdgfrb</i> | TTCCAGGAGTGATACCAGCTT   | AGGGGGCGTGATGACTAGG     |
| <i>Acta2</i>  | GTCCCAGACATCAGGGAGTAA   | TCGGATACTTCAGCGTCAGGA   |

## References

- 1 Kinugasa-Katayama, Y. *et al.* Tmem100-BAC-EGFP mice to selectively mark and purify embryonic endothelial cells of large caliber arteries in mid-gestational vascular formation. *Genesis* **59**, e23416 (2021).  
<https://doi.org:10.1002/dvg.23416>
- 2 Poh, Y. C. *et al.* Generation of organized germ layers from a single mouse embryonic stem cell. *Nat Commun* **5**, 4000 (2014).  
<https://doi.org:10.1038/ncomms5000>
